# Supplementary material for: Diverse Host-Seeking Behaviors of Skin-Penetrating Nematodes
Source: PLOS journal article supplement (doi:10.1371/journal.ppat.1004305), 2014-08-14

Figure S3

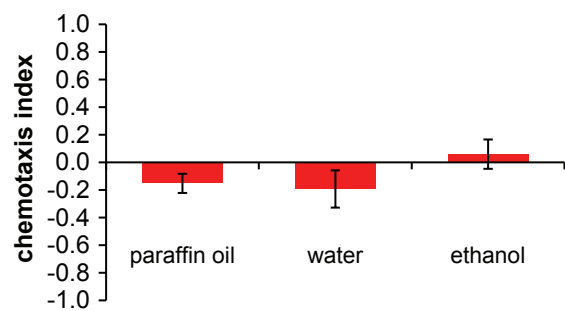

Supplement: S3 (10.1371/journal.ppat.1004305.s003) [file journal.ppat.1004305.s003]
