# Supplementary material for: Diverse Host-Seeking Behaviors of Skin-Penetrating Nematodes
Source: PLOS journal article supplement (doi:10.1371/journal.ppat.1004305), 2014-08-14

Figure S6

**A** Olfactory responses of *Str. rattii*

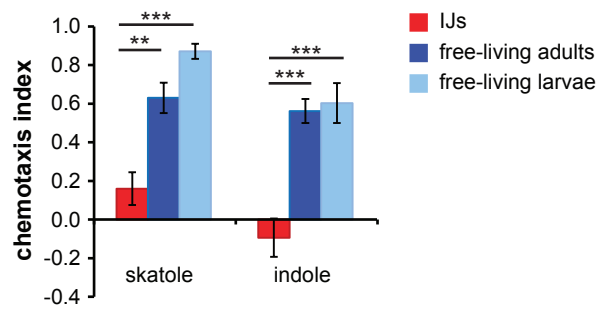

**B** Olfactory responses of *Str. stercoralis*

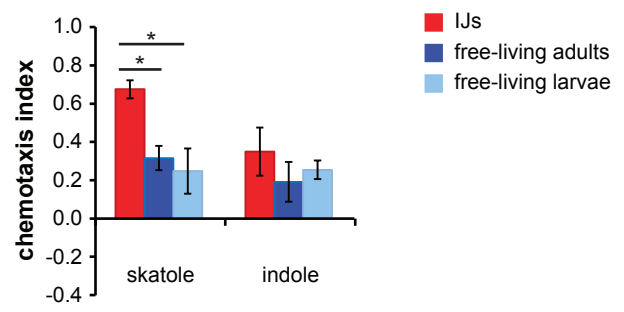

Supplement: S6 (10.1371/journal.ppat.1004305.s006) [file journal.ppat.1004305.s006]
